# Supplementary material for: Monomer stoichiometry imbalance-promoted formation of multisubstituted polynaphthalenes by palladium-catalyzed polycouplings of aryl iodides and internal diynes
Source: Royal Society of Chemistry journal article supplement (doi:10.1039/c7py01926b), 2018-01-01
Supplement: c7py01926b1.pdf [file c7py01926b1.pdf]

Electronic Supporting Information

# Monomer Stoichiometry Imbalance-Promoted Formation of Multisubstituted Polynaphthalenes by Palladium-Catalyzed Polycouplings of Aryl Iodides and Internal Diynes

*Ting Han,<sup>a,b</sup> Zheng Zhao,<sup>a,b</sup> Jacky W. Y. Lam,<sup>\*,a,b</sup> and Ben Zhong Tang<sup>\*,a,b</sup>*

<sup>a</sup>HKUST-Shenzhen Research Institute, No. 9 Yuexing 1st RD, South Area, Hi-tech  
Park, Nanshan, Shenzhen 518057, China

<sup>b</sup>Department of Chemistry, Hong Kong Branch of Chinese National Engineering  
Research Center for Tissue Restoration and Reconstruction, Institute for Advanced  
Study, Institute of Molecular Functional Materials, Division of Biomedical  
Engineering and Division of Life Science, The Hong Kong University of Science &  
Technology, Clear Water Bay, Kowloon, Hong Kong

\*Jacky W. Y. Lam (E-mail: [chjacky@ust.hk](mailto:chjacky@ust.hk)) or B. Z. Tang (E-mail: [tangbenz@ust.hk](mailto:tangbenz@ust.hk)).

Tel.: +852-2358-7375 (8801). Fax: +852-2358-1594.

## Table of Contents

**Figure S1.** High-resolution mass spectrum of **4**.

**Table S1.** Effect of catalyst loading on the polymerization of **1a** and **2a**.

**Table S2.** Time course on the polymerization of **1a** and **2a**.

**Figure S2.**  $^1\text{H}$  NMR spectra of (A) **1a**, (B) **2a**, (C) **4** and (D) **P1a/2a** (sample taken from Table 1, no. 2) in chloroform-*d*.

**Figure S3.** IR spectra of (A) **1a**, (B) **2a**, (C) **4** and (D) **P1a/2a** (sample taken from Table 1, no. 2).

**Figure S4.**  $^{13}\text{C}$  NMR spectra of (A) **1a**, (B) **2a**, (C) **4** and (D) **P1a/2a** (sample taken from Table 1, no. 2) in chloroform-*d*.

**Figure S5.** TGA thermograms of **P1/2** (samples taken from Table 4) recorded (A) under nitrogen and (B) under air at a heating rate of 10 °C/min.

**Figure S6.** DSC thermograms of **P1/2** recorded under nitrogen during the second heating cycle at a heating rate of 10 °C/min.

**Figure S7.** Two-dimensional fluorescent photopatterns of (A) **2b** and (B) **2c** taken under UV light illumination. Scale bar: 200  $\mu\text{m}$ ; excitation wavelength: 330–385 nm.

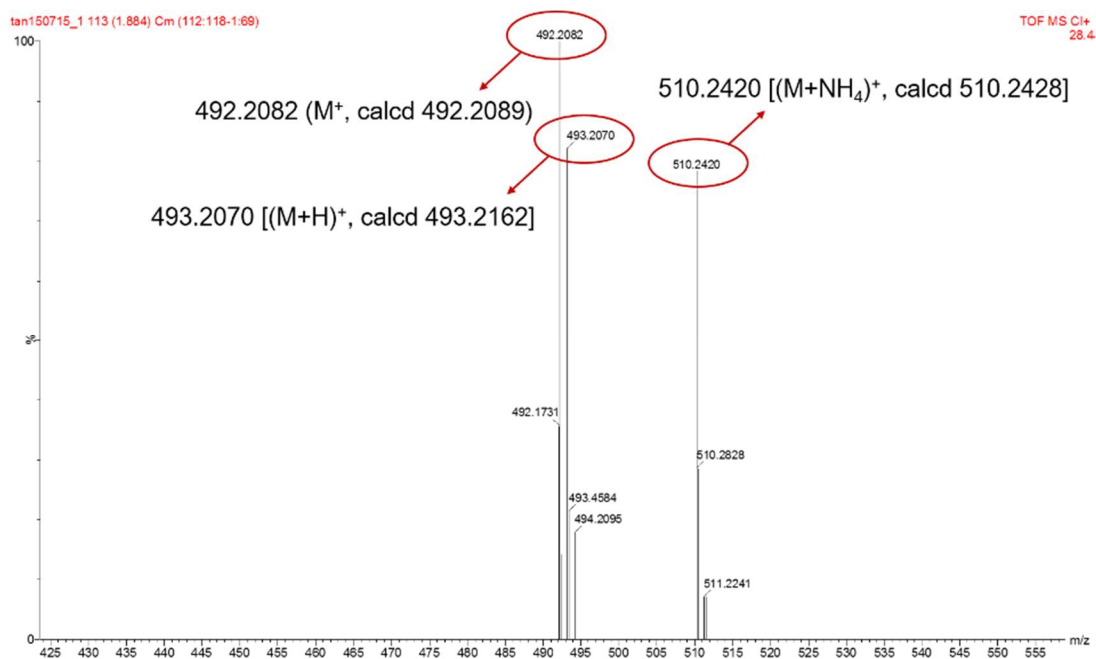

**Figure S1.** High-resolution mass spectrum of **4**.

**Table S1.** Effect of catalyst loading on the polymerization of **1a** and **2a**<sup>a</sup>

| No.            | [Pd(OAc) <sub>2</sub> ] (M) | [ <b>1a</b> ]:[ <b>2a</b> ] | Yield (%) | $M_n^b$ | $M_w^b$ | PDI <sup>b</sup> |
|----------------|-----------------------------|-----------------------------|-----------|---------|---------|------------------|
| 1 <sup>c</sup> | 0.02                        | 1.25:1                      | 98.5      | 13 200  | 43 400  | 3.3              |
| 2              | 0.04                        | 1.25:1                      | 94.8      | 15 900  | 43 800  | 2.8              |
| 3              | 0.06                        | 1.25:1                      | Gel       |         |         |                  |
| 4              | 0.04                        | 1:1                         | Gel       |         |         |                  |
| 5              | 0.04                        | 1.5:1                       | 86.9      | 12 500  | 39 100  | 3.1              |

<sup>a</sup> Carried out in *o*-xylene under nitrogen at 80 °C in the presence of Pd(OAc)<sub>2</sub>, Ag<sub>2</sub>CO<sub>3</sub> and P(2-furyl)<sub>3</sub>. [**2a**] = 0.20 M, [Ag<sub>2</sub>CO<sub>3</sub>] = 0.40 M. [P(2-furyl)<sub>3</sub>] = 0.06 M. <sup>b</sup> Determined by GPC in THF on the basis of a linear polystyrene calibration. PDI = polydispersity index =  $M_w/M_n$ . <sup>c</sup> Data taken from Table 1, no. 3.

**Table S2. Time course on the polymerization of 1a and 2a<sup>a</sup>**

| No.            | Time (h) | Yield (%) | $M_n^b$ | $M_w^b$ | PDI <sup>b</sup> |
|----------------|----------|-----------|---------|---------|------------------|
| 1              | 1        | 3.8       | 2 300   | 2 800   | 1.2              |
| 2              | 3        | 94.1      | 11 300  | 27 200  | 2.4              |
| 3              | 6        | 95.0      | 11 600  | 30 300  | 2.6              |
| 4              | 12       | 98.0      | 12 200  | 36 500  | 3.0              |
| 5              | 18       | 99.0      | 12 900  | 40 100  | 3.1              |
| 6 <sup>c</sup> | 24       | 98.5      | 13 200  | 43 400  | 3.3              |
| 7              | 30       | 99.1      | 13 400  | 48 100  | 3.6              |

<sup>a</sup> Carried out in *o*-xylene under nitrogen at 80 °C in the presence of Pd(OAc)<sub>2</sub>, Ag<sub>2</sub>CO<sub>3</sub> and P(2-furyl)<sub>3</sub>. [1a] = 0.25 M, [2a] = 0.20 M, [Pd] = 0.01 M, [Ag<sub>2</sub>CO<sub>3</sub>] = 0.20 M. [P(2-furyl)<sub>3</sub>] = 0.03 M. <sup>b</sup> Determined by GPC in THF on the basis of a linear polystyrene calibration. PDI = polydispersity index =  $M_w/M_n$ . <sup>c</sup> Data taken from Table 1, no. 3.

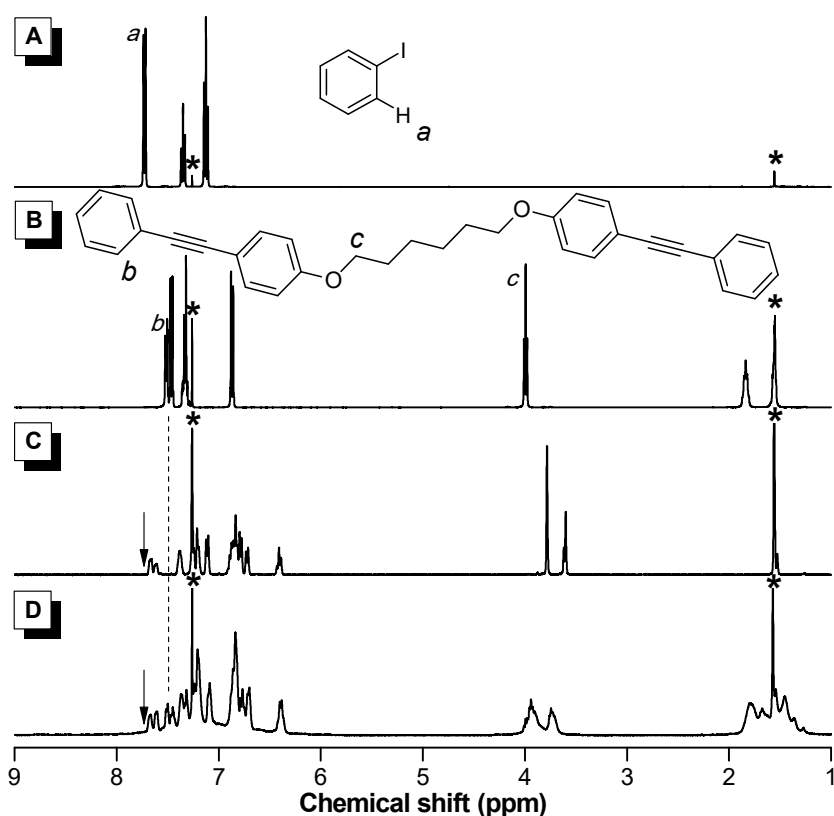

**Figure S2.** <sup>1</sup>H NMR spectra of (A) 1a, (B) 2a, (C) 4 and (D) P1a/2a (sample taken from Table 1, no. 2) in chloroform-*d*.

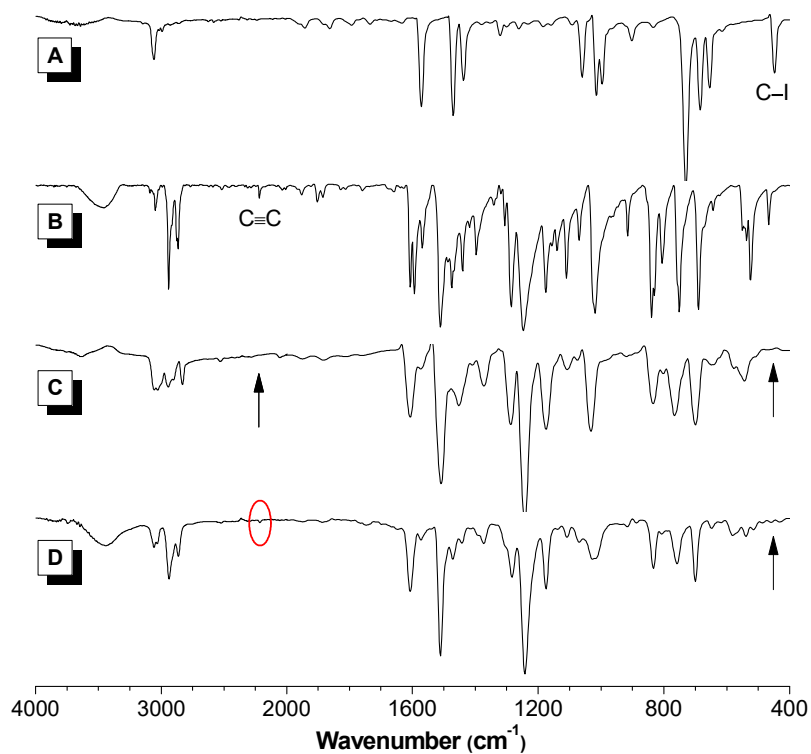

**Figure S3.** IR spectra of (A) **1a**, (B) **2a**, (C) **4** and (D) **P1a/2a** (sample taken from Table 1, no. 2).

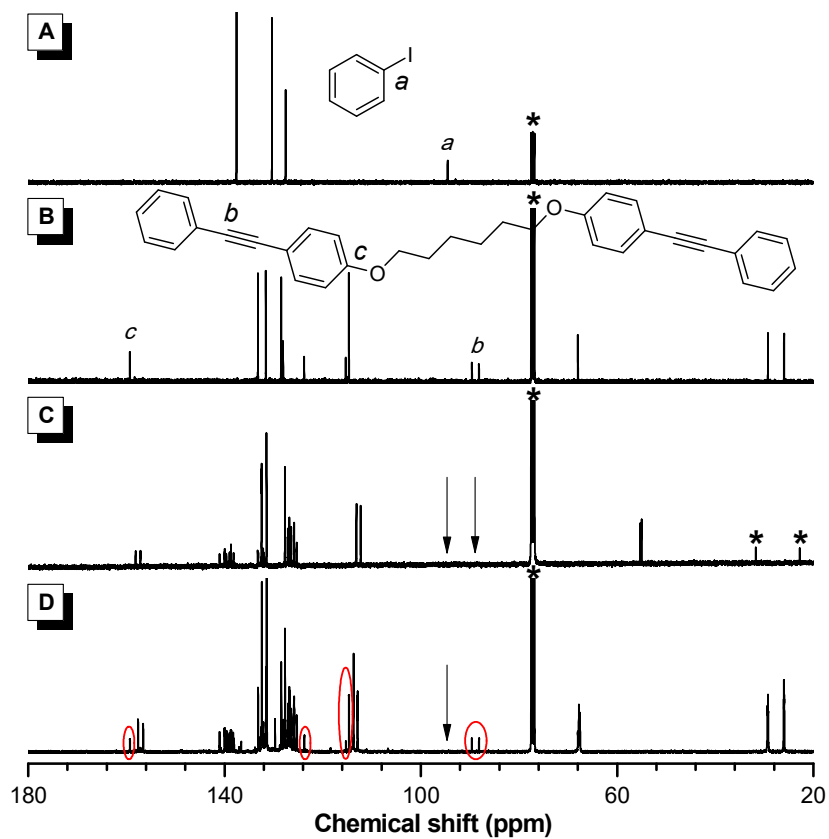

**Figure S4.**  $^{13}\text{C}$  NMR spectra of (A) **1a**, (B) **2a**, (C) **4** and (D) **P1a/2a** (sample taken from Table 1, no. 2) in chloroform-*d*.

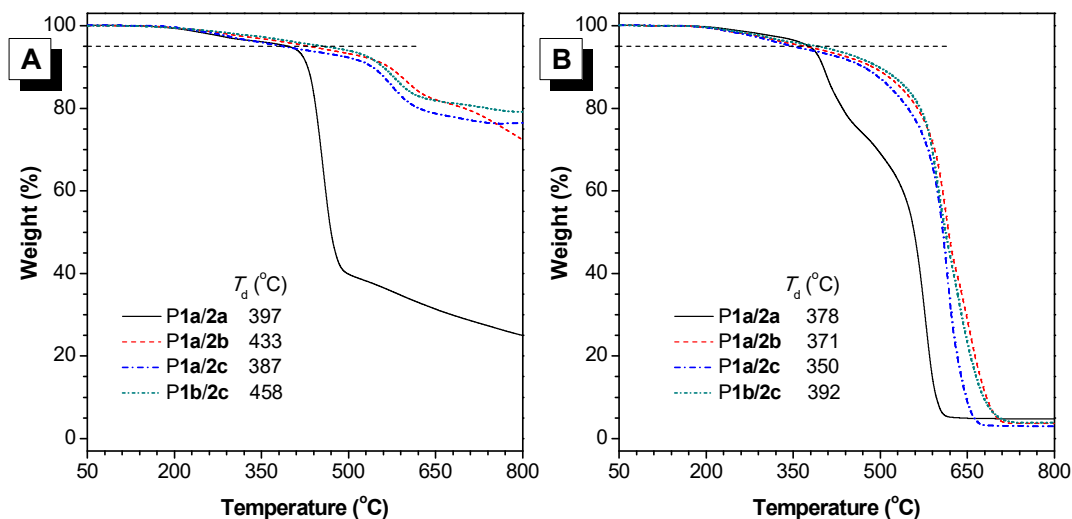

**Figure S5.** TGA thermograms of P1/2 (samples taken from Table 4) recorded (A) under nitrogen and (B) under air at a heating rate of 10 °C/min.

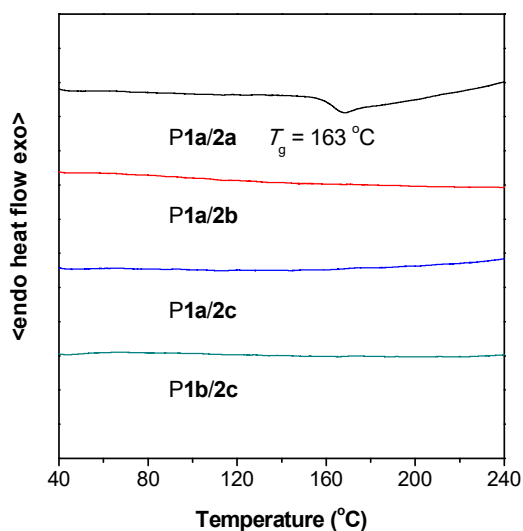

**Figure S6.** DSC thermograms of P1/2 recorded under nitrogen during the second heating cycle at a heating rate of 10 °C/min.

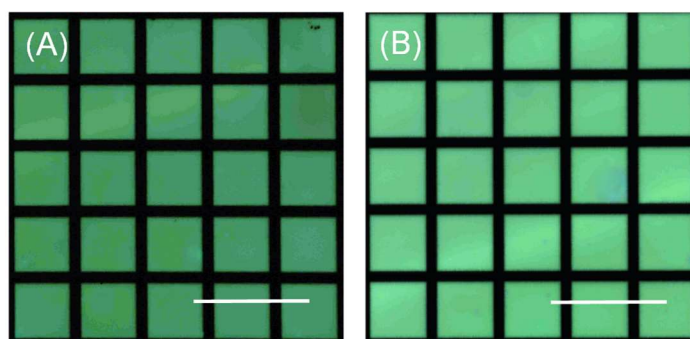

**Figure S7.** Two-dimensional fluorescent photopatterns of (A) 2b and (B) 2c taken under UV light illumination. Scale bar: 200 μm; excitation wavelength: 330–385 nm.
